# Supplementary material for: Evaluating the In Vivo Specificity of [18F]UCB-H for the SV2A Protein, Compared with SV2B and SV2C in Rats Using microPET
Source: MDPI journal article supplement (doi:10.3390/molecules24091705), 2019-05-01
Supplement: s1 [file s1]

Supplementary Data

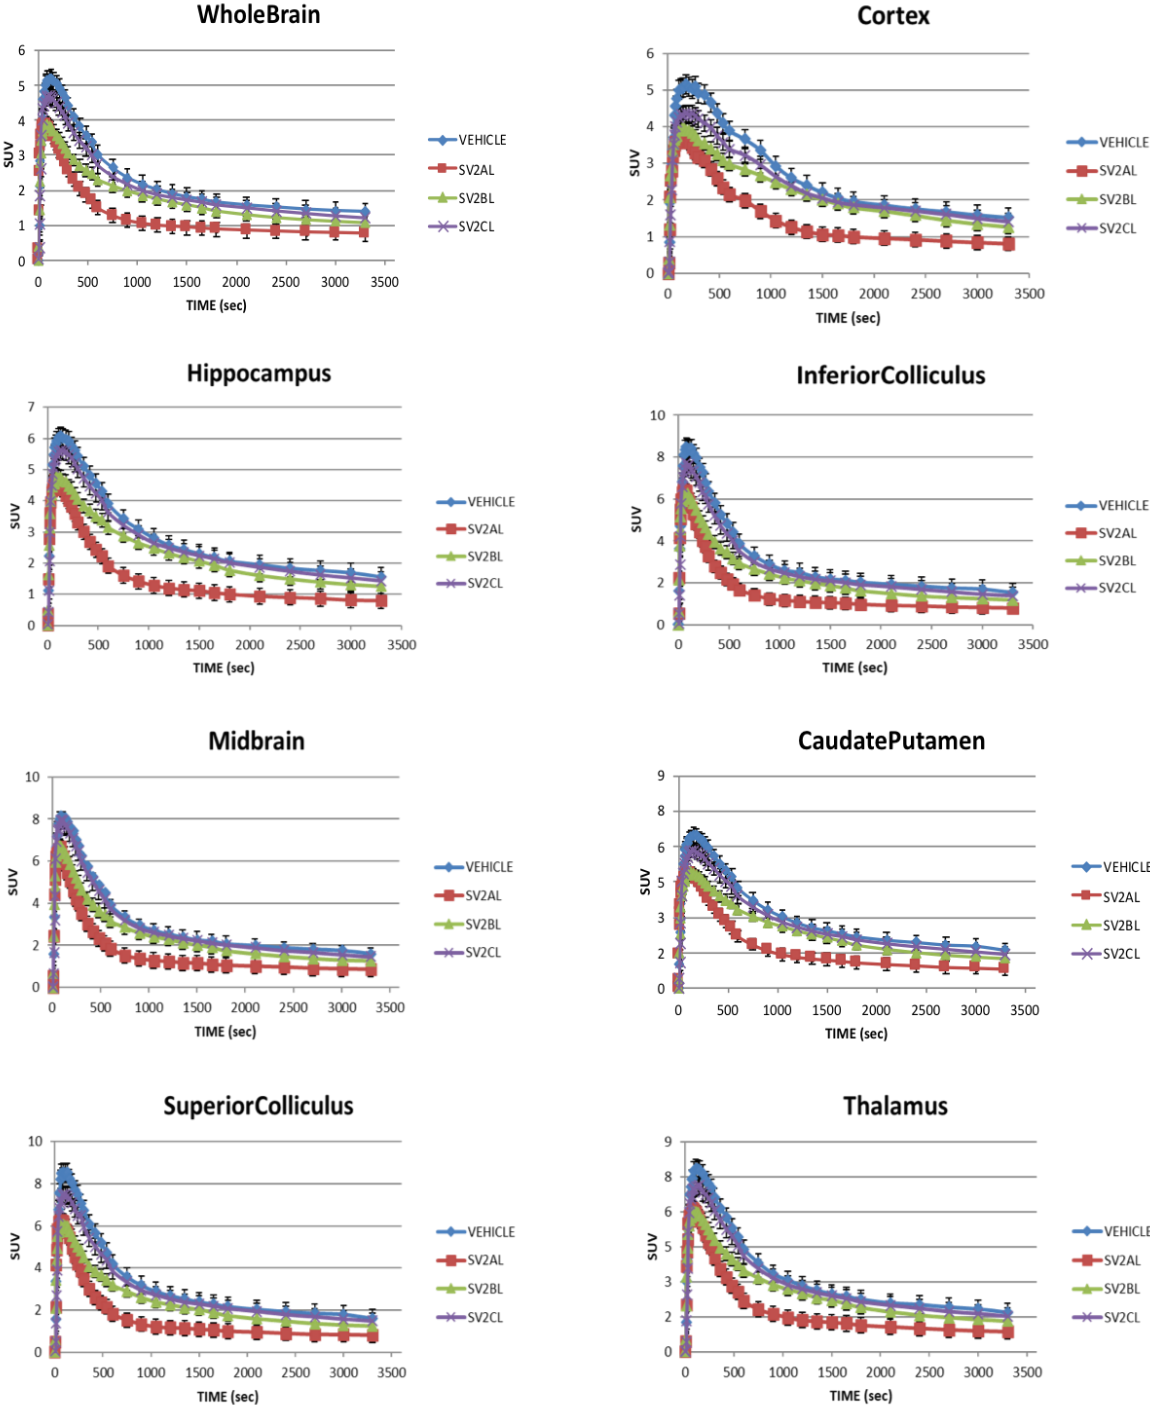

Figure S1. Time activity curves (TACs) corresponding to the four different treatments (vehicle, SV2AL, SV2BL, and SV2CL), for all the regions of interest (ROIs).
